# Supplementary material
Source: PubMed Central journal article supplement (PMC4417942)
Supplement: NIHMS683085-supplement-Supplementary_Data.pdf [file NIHMS683085-supplement-Supplementary_Data.pdf]

## Supplementary Data

**Supplementary Table 1.** Clinical and molecular data from all HME patients in the cohort

| Patient ID | Somatic Mutation      | CN  | BC  | PMG | Heterotopia | Age Sz onset (yr) | Sz Status Post | Gender | Age at Surgery(yr) | Other                              |
|------------|-----------------------|-----|-----|-----|-------------|-------------------|----------------|--------|--------------------|------------------------------------|
| HME-1565   | AKT3<br>p.Glu17Lys    | Yes | No  | Yes | Yes         | 0.48              | Not Sz Free    | Female | 0.5                |                                    |
| HME-1563   | MTOR<br>p.Cys1483Tyr  | Yes | No  | No  | Yes         | 4.4               | Sz Free        | Male   | 4.3                | Hypomelanosis of Ito               |
| HME-1573   | PIK3CA<br>p.Glu545Lys | Yes | No  | Yes | Yes         | 0.32              | Sz Free        | Male   | 0.33               |                                    |
| HME-1916   | PIK3CA<br>p.Glu545Lys | Yes | No  | Yes | Yes         | 0.34              | Sz Free        | Male   | 0.33               |                                    |
| HME-1564   | PIK3CA<br>p.Glu545Lys | No  | No  | Yes | Yes         | 0.48              | Sz Free        | Male   | 0.5                |                                    |
| HME-1855   | PIK3CA<br>p.Glu545Lys | Yes | No  | Yes | Yes         | 3.72              | Sz Free        | Male   | 3.7                | Hemihypertrophy of right hand/foot |
| UCLA-HME#4 | Unknown               | Yes | Yes | No  | No          | 0.19              | Sz Free        | Male   | 0.2                |                                    |
| HME-1915   | Unknown               | Yes | No  | Yes | No          | 0.23              | Sz Free        | Male   | 0.2                |                                    |
| HME-1574   | Unknown               | Yes | Yes | Yes | No          | 0.3               | Not Sz Free    | Female | 0.25               | CD in opposite mesial frontal lobe |
| HME-1914   | Unknown               | Yes | No  | No  | Yes         | 0.33              | Sz Free        | Female | 0.33               |                                    |
| HME-1620   | Unknown               | Yes | Yes | No  | Yes         | 0.44              | Sz Free        | Male   | 0.45               |                                    |
| HME-1619   | Unknown               | Yes | Yes | Yes | Yes         | 0.63              | Sz Free        | Female | 0.67               |                                    |
| HME-1590   | Unknown               | Yes | No  | No  | No          | 0.66              | Sz Free        | Female | 0.75               |                                    |
| UCLA-HME#7 | Unknown               | No  | No  | Yes | No          | 1.5               | Sz Free        | Female | 1.4                |                                    |
| HME-1908   | Unknown               | No  | No  | No  | Yes         | 0.01              | Sz Free        | Male   | 1.5                |                                    |
| HET-1589   | Unknown               | No  | No  | No  | Yes         | 1.5               | Sz Free        | Male   | 1.5                |                                    |
| HME-1917   | Unknown               | No  | No  | No  | Yes         | 1.7               | Sz Free        | Male   | 1.7                |                                    |
| HME-1629   | Unknown               | No  | No  | Yes | Yes         | 2.41              | Not Sz Free    | Male   | 2.4                |                                    |
| HME-1566   | Unknown               | No  | No  | Yes | Yes         | 4.1               | Sz Free        | Male   | 4                  |                                    |
| HME-1562   | Unknown               | No  | No  | Yes | Yes         | 0.83              | Sz Free        | Male   | 9.5                |                                    |

CN=cytomegalic neuron, BC=Balloon cells, PMG=polymicrogyria, Sz=Seizure, CD=cortical dysplasia  
+Ordered by gene name and age at surgery

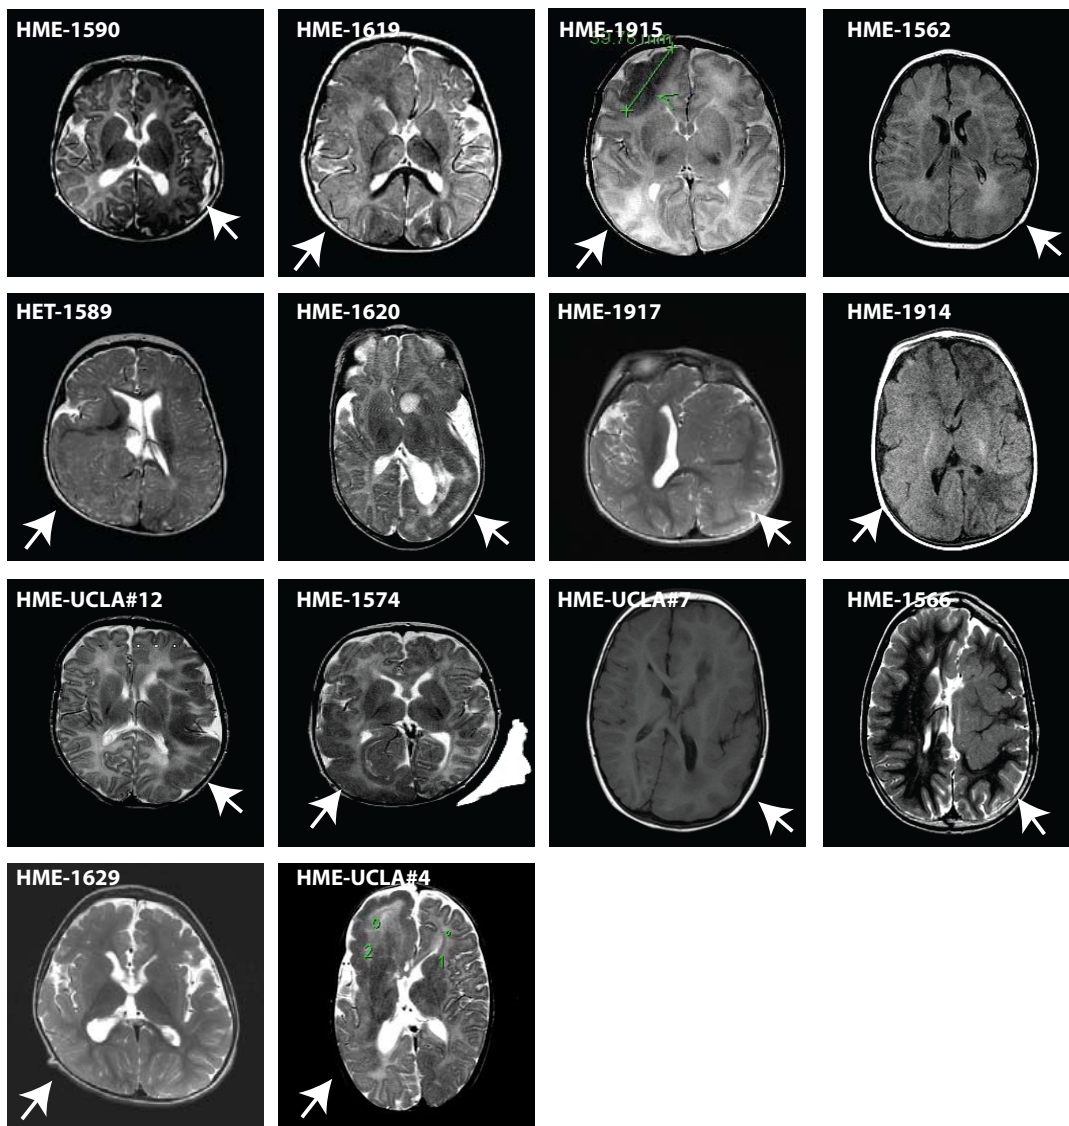

**Supplementary Figure 1.** Brain MRIs from mutation-negative patients involved in this study. Arrows highlights the affected hemispheres.

**a** Modified PCR-restriction enzyme assays for *AKT1* mutation

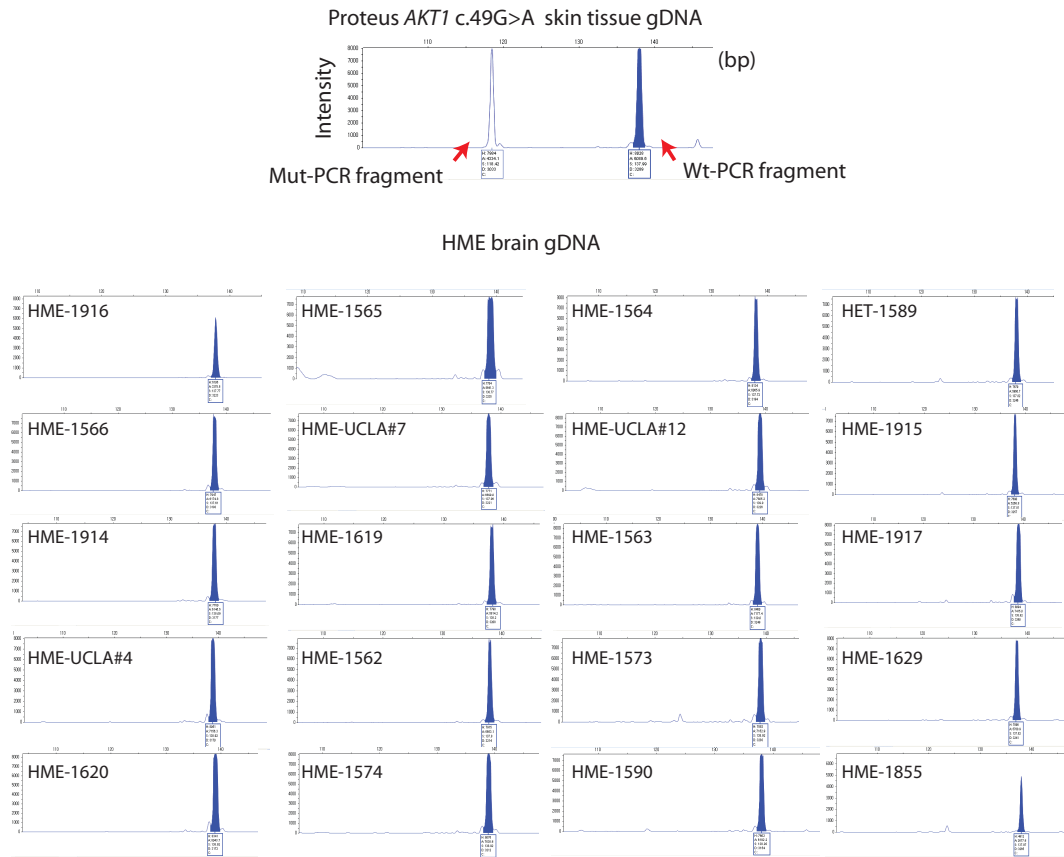

**b** Exclusion of significant CNVs in HME brain using SNP genotyping arrays

| Patients | Tissues | Positions(hg19)          | Number of SNP | Length(bp) | Copy number | Start/End SNP                         |
|----------|---------|--------------------------|---------------|------------|-------------|---------------------------------------|
| HME-1563 | Brain   | chr6:168356152-168599333 | 37            | 243,182    | 3           | startsnp=rs9346633 endsnp=rs2306286   |
|          |         | chr12:85171056-85550132  | 8             | 379,077    | 4           | startsnp=rs1452243 endsnp=rs2174754   |
|          | Blood   | chr6:168356152-168576278 | 32            | 220,127    | 3           | startsnp=rs9346633 endsnp=rs6941655   |
|          |         | chr12:83695187-85603531  | 9             | 432,476    | 4           | startsnp=rs1452243 endsnp=rs1354839   |
| HME-1565 | Brain   | chr10:47596804-47701570  | 9             | 104,767    | 3           | startsnp=rs1870519 endsnp=rs11596854  |
|          | Blood   | chr10:47596804-47701570  | 9             | 104,767    | 3           | startsnp=rs1870519 endsnp=rs11596854  |
| HME-1573 | Brain   | chr1:149039120-149211496 | 7             | 172,377    | 3           | startsnp=rs11579261 endsnp=rs12409037 |
| HME-1574 | Brain   | chr12:31359210-31398147  | 4             | 38,938     | 3           | startsnp=rs2164498 endsnp=rs7957449   |
|          | Blood   | chr12:31385094-31398147  | 3             | 13,054     | 3           | startsnp=rs4931471 endsnp=rs7957449   |
| HME-1620 | Brain   | chr14:43876895-44236516  | 16            | 359,622    | 3           | startsnp=rs974953 endsnp=rs11157364   |
|          | Blood   | chr14:43876895-44246488  | 17            | 369,594    | 3           | startsnp=rs974953 endsnp=rs11157365   |

**Supplementary Figure 2.** Lack of *AKT1* c.49G>A mutation or significant *de novo* copy number variations in HME brains. **(a)** Top: Proteus syndrome sample testing positive for the *AKT1* c.49G>A mutation, with approximately 41% of PCRred alleles showing the mutation using the modified PCR-restriction enzyme assays. Filled peak: wildtype allele, Unfilled peak: Mutant allele. **(b)** Exclusion of significant *de novo* CNVs in HME brain using SNP genotyping array. Most detected CNVs in this

cohort were identified in both brain and blood samples. Only HME-1573 showed a *de novo* CNV in brain, but this CNV is reported in healthy controls.

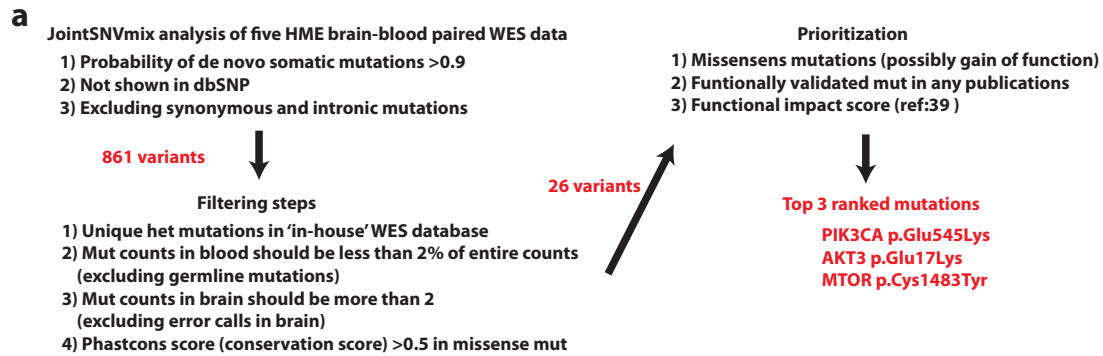

**b** Integrative Genomic Viewer of WES data

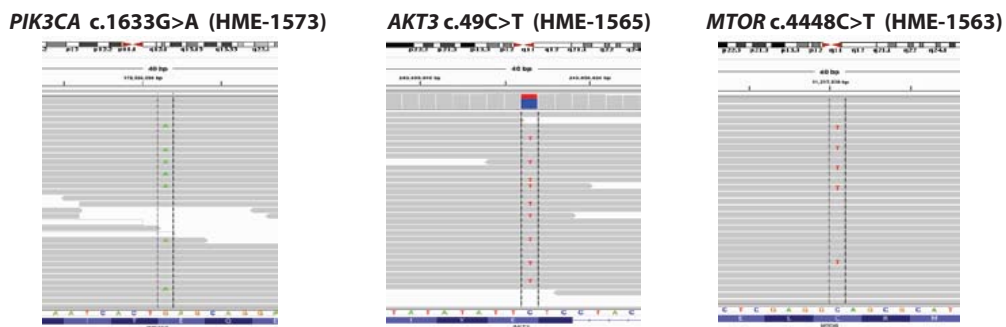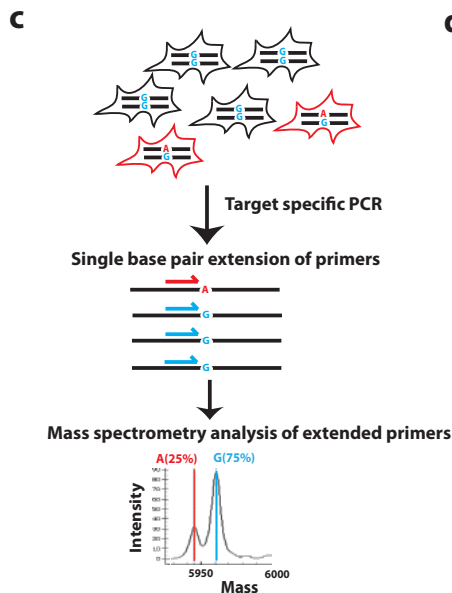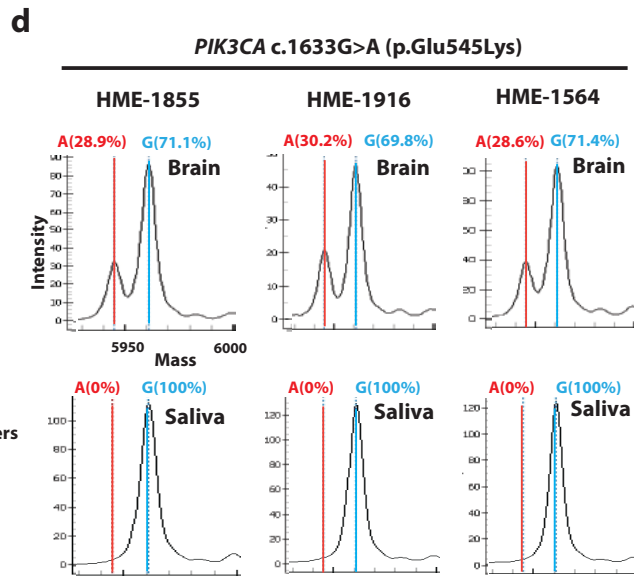

**Supplementary Figure 3.** The work-flow of whole exome sequencing and mass-spectrometry analysis (**a**) The general work-flow of analysis and prioritization of JointSNVMix data. JointSNVMix utilized aligned sequence data in base space stored in the BAM format to generate JointSNVMix output with 7036 variant calls. To stringently detect HME brain specific mutations, we selected JointSNVMix output

with a high threshold probability of somatic mutation ( $P[\text{somatic}] > 0.9$ , meaning less than 1:10 of the disagree rate) and excluded variants found in dbSNP (normal variants database), as well as synonymous or intronic variants. After this process, we found 861 variants specific to HME brains. We subsequently filtered any germline mutations in HME blood, erroneous calls in HME brain, and variants in evolutionarily non-conserved sequence to 26 novel heterozygous variants. We prioritized variants for those likely to be gain-of-function by considering previous reports and functional impact scores reflecting the biological importance of evolutionarily conserved sequence<sup>42</sup>. **(b)** Visualization of identified somatic mutation calls in WES. Variants were visually inspected in Integrative Genomic Viewer. **(c)** Schematic figure of mutation burden analysis. A single base pair extension on target sequence was followed by mass spectrometry analysis, allowing detection of the mass difference due to a single nucleotide change. **(d)** Mutation burden analysis in HME cohort identified a recurrent *PIK3CA* c.1633G>A in three more patients (HME-1855, -1916, and -1564) with ~30% mutation frequencies. Saliva samples from all these patients were negative for the *PIK3CA* c.1633G>A mutation.
